# Supplementary material
Source: PubMed Central journal article supplement (PMC4739508)

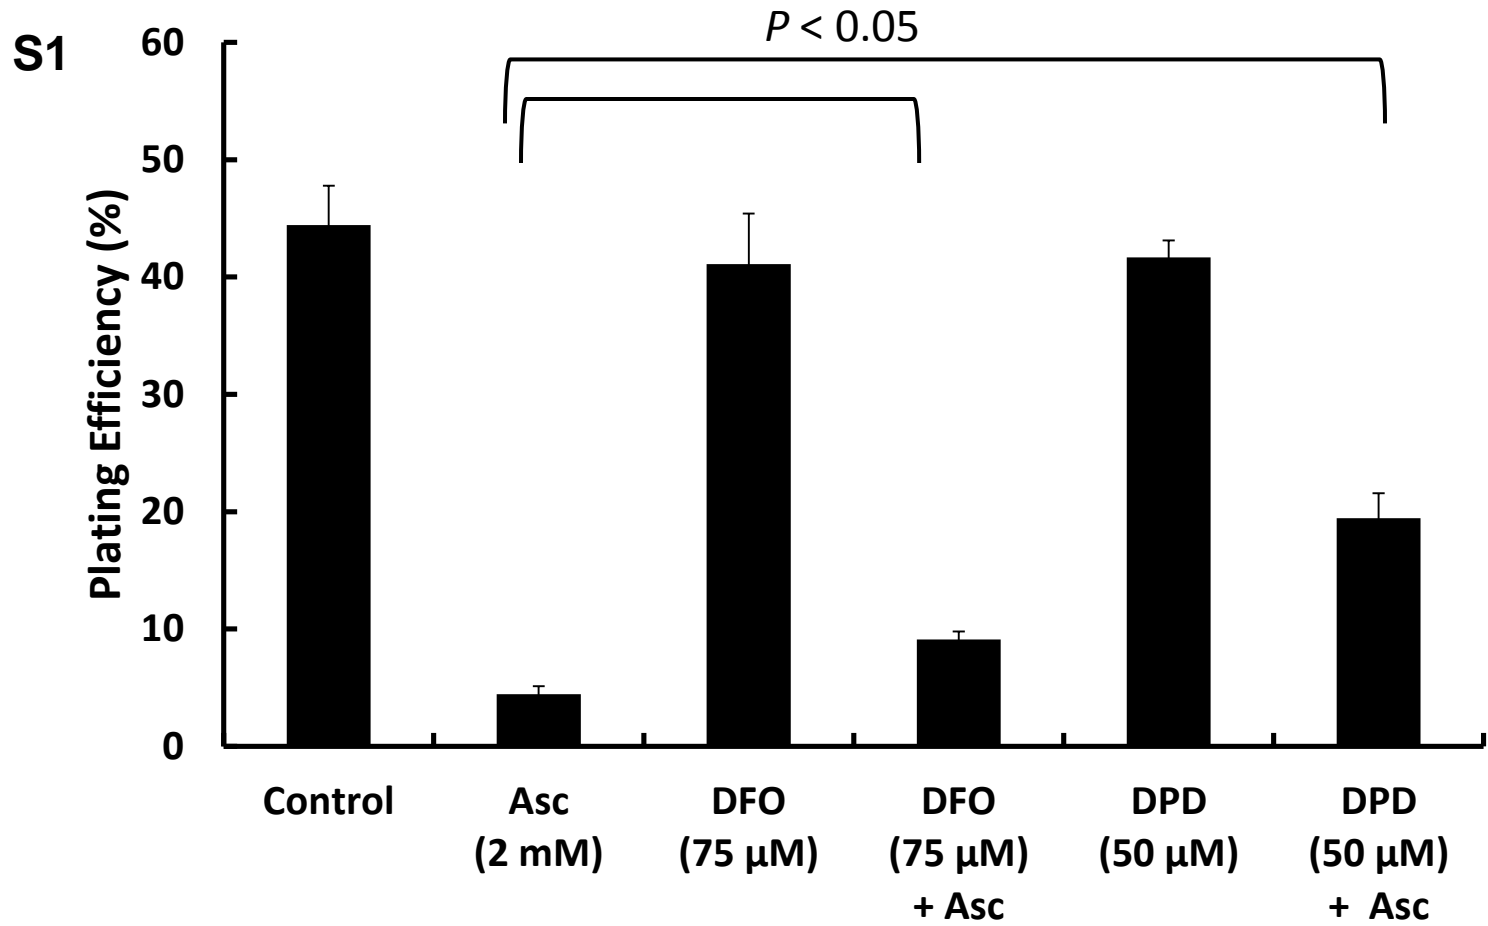

Supplement: NIHMS755146-supplement-1.pdf [file NIHMS755146-supplement-1.pdf]

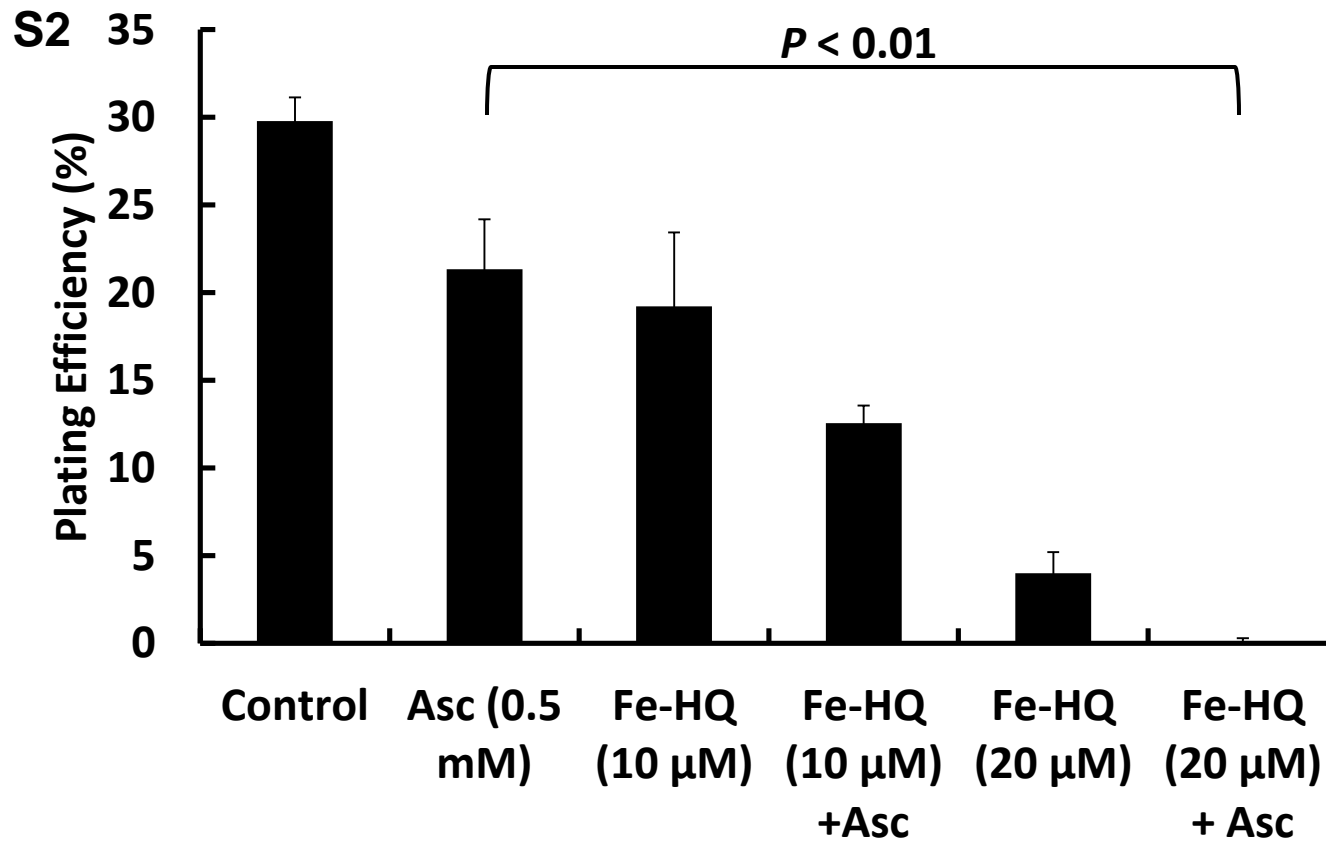

Supplement: NIHMS755146-supplement-2.pdf [file NIHMS755146-supplement-2.pdf]
